# Supplementary material
Source: PubMed Central journal article supplement (PMC2186233)
Supplement: mmc1.pdf [file mmc1.pdf]

**Table S1:** Block averaged helicity of poly-alanine as a function of selected temperatures during three simulation intervals.

| $\epsilon$ | T in K | I: 10.5-21.75 ns | II: 21.75-33 ns | III: 33-44.25 ns |
|------------|--------|------------------|-----------------|------------------|
| 80         | 464.8  | 0.01             | 0.02            | 0.01             |
|            | 401.7  | 0.04             | 0.09            | 0.08             |
|            | 347.1  | 0.57             | 0.76            | 0.83             |
|            | 300.0  | 0.84             | 0.89            | 0.94             |
| 20         | 464.8  | 0.03             | 0.05            | 0.04             |
|            | 401.7  | 0.22             | 0.35            | 0.35             |
|            | 347.1  | 0.66             | 0.82            | 0.82             |
|            | 300.0  | 0.95             | 0.91            | 0.93             |
| 5          | 464.8  | 0.61             | 0.58            | 0.53             |
|            | 401.7  | 0.82             | 0.80            | 0.81             |
|            | 347.1  | 0.91             | 0.89            | 0.91             |
|            | 300.0  | 0.96             | 0.94            | 0.96             |

**Table S2:** Block averaged cluster populations of melittin during three simulation intervals.

| $\epsilon$ | time         | cluster 1 | cluster 2 | cluster 3 | cluster 4 | cluster 5 |
|------------|--------------|-----------|-----------|-----------|-----------|-----------|
| 5          | 37.5-52.5 ns | 99.3      | 0.8       | 0.0       | 0.0       | 0.0       |
|            | 52.5-67.5 ns | 93.3      | 6.8       | 0.0       | 0.0       | 0.0       |
|            | 67.5-82.5 ns | 100.0     | 0.0       | 0.0       | 0.0       | 0.0       |
| 20         | 37.5-52.5 ns | 29.4      | 0.0       | 27.3      | 35.4      | 8.0       |
|            | 52.5-67.5 ns | 33.3      | 0.1       | 31.1      | 27.0      | 8.3       |
|            | 67.5-82.5 ns | 48.1      | 0.0       | 33.7      | 10.1      | 7.6       |
| 40         | 37.5-52.5 ns | 44.9      | 23.0      | 16.8      | 14.7      | 0.1       |
|            | 52.5-67.5 ns | 33.4      | 7.3       | 48.0      | 11.1      | 0.0       |
|            | 67.5-82.5 ns | 21.5      | 0.0       | 64.1      | 14.0      | 0.0       |
| 80         | 37.5-52.5 ns | 0.1       | 5.4       | 73.6      | 13.4      | 0.0       |
|            | 52.5-67.5 ns | 0.0       | 0.0       | 88.4      | 7.6       | 2.9       |
|            | 67.5-82.5 ns | 0.0       | 0.0       | 80.7      | 11.3      | 7.1       |
